# Supplementary material
Source: publisher figshare collection journal article supplement (https://frontiersin.figshare.com/ndownloader/files/12417089)
Supplement: Supplementary file [file 12417089]

**Table S1. Cysteine linkage screening to stabilize soluble JRFL NFL trimers.**

| Name | Position #1 | Region | Sec Stuc | Position #2 | Region  | Sec Stuc | C $\alpha$ - C $\alpha$ Distance (Å) | 2G12             | VRC06 | PGT145 | PGT151          | F105 | 19b |
|------|-------------|--------|----------|-------------|---------|----------|--------------------------------------|------------------|-------|--------|-----------------|------|-----|
|      | L34C        | C1     | S        | W610C       | CC-LOOP | L        | 5.51                                 | +++ <sup>a</sup> | -     | -      | ND <sup>b</sup> | +    | ND  |
|      | W35C        | C1     | S        | V608C       | CC-LOOP | L        | 5.62                                 | +++              | -     | -      | ND              | +    | ND  |
|      | W35C        | C1     | S        | P609C       | CC-LOOP | L        | 4.91                                 | ++               | -     | -      | ND              | +    | ND  |
|      | T37C        | C1     | S        | T605C       | CC-LOOP | S        | 4.68                                 | ++               | -     | -      | ND              | ++   | ND  |
|      | Y39C        | C1     | S        | L602C       | CC-LOOP | L        | 5.62                                 | ++               | -     | -      | ND              | ++   | ND  |
|      | Y39C        | C1     | S        | I603C       | CC-LOOP | S        | 4.99                                 | +++              | -     | -      | ND              | ++   | ND  |
|      | Y40C        | C1     | S        | L602C       | CC-LOOP | L        | 4.55                                 | +++              | -     | -      | ND              | ++   | ND  |
|      | P43C        | C1     | L        | A526C       | FP      | L        | 5.06                                 | ++               | -     | -      | +/-             | +    | ++  |
|      | N88C        | C1     | L        | G527C       | FP      | L        | 4.62                                 | ++               | -     | -      | +/-             | +    | ++  |
| SOS  | A501C       | C5     | L        | T605C       | CC-LOOP | S        | 6.26                                 | +++              | ++    | ++     | +/-             | +/-  | ++  |
|      | V89C        | C1     | L        | G527C       | FP      | L        | 4.77                                 | ++               | +/-   | +      | +/-             | +    | ++  |
|      | T529C       | FPPR   | L        | T627C       | HR2     | L        | 4.52                                 | +++              | -     | -      | -               | ++   | ++  |
|      | M626C       | HR2    | L        | T529C       | HR2     | L        | 5.17                                 | +/-              | -     | -      | +/-             | +/-  | +/- |
| CC1  | I201C       | C2     | S        | A433C       | C4      | S        | 4.66                                 | +++              | ++    | +      | +               | +    | +   |
| CC2  | A501C       | C5     | L        | L663C       | HR2     | H        | 4.35                                 | ++               | ++    | ++     | +/-             | +    | ++  |

<sup>a</sup> Antibody binding is scaled from no binding reactivity (-) to strong binding (+++).

<sup>b</sup> ND: Not determined.
